# Supplementary material for: Novel low-melting salts with donor–acceptor substituents as targets for second-order nonlinear optical applications
Source: Royal Society of Chemistry journal article supplement (doi:10.1039/b810671a), 2008-01-01
Supplement: b810671a.pdf [file b810671a.pdf]

## Novel Low Melting Salts with Donor-Acceptor Substituents as Targets for Second-Order Nonlinear Optical Applications

Zhi-Qiang Zhu,<sup>a</sup> Shaoji Xiang,<sup>a</sup> Qing-Yun Chen,<sup>a</sup> Chaosen Chen,<sup>b</sup> Zhuo Zeng,<sup>b</sup> Yi -Ping Cui\*<sup>c</sup>  
and Ji -Chang Xiao\*<sup>a</sup>

<sup>a</sup> Key Laboratory of Organofluorine Chemistry, Shanghai Institute of Organic Chemistry, Chinese Academy of Sciences, 354 Fenglin Road, Shanghai 200032, P. R. China. Fax: (+86) 21-6416 6128; E-mail:jchxiao@mail.sioc.ac.cn

<sup>b</sup> College of Chemistry and Environment, South China Normal University, Guangzhou 510631, P. R. China.

<sup>c</sup> Advanced Photonics Center, School of Electronic Science and Engineering, Southeast University, Nanjing 210096, P. R. China.

**General methods:** All reactions were carried out under nitrogen atmosphere. All the reagents used were purchased from commercial sources and used without further purification. *N*-arylimidazoles were prepared according to the reported procedure.<sup>[1]</sup> DMSO and acetonitrile were freshly distilled from CaH<sub>2</sub>. Acetone were freshly distilled from K<sub>2</sub>CO<sub>3</sub>. <sup>1</sup>H, <sup>13</sup>C and <sup>19</sup>F NMR spectra were recorded in CDCl<sub>3</sub>, DMSO-d<sub>6</sub>, D<sub>2</sub>O and Acetone-d<sub>6</sub> on a spectrometer operating at 300, 75 and 282.4 MHz, respectively. Chemical shifts are reported in parts per million relative to the appropriate standard: TMS for <sup>1</sup>H and CFCl<sub>3</sub> for <sup>19</sup>F and <sup>13</sup>C NMR spectra. Mass spectra were recorded on a Shimadzu LCMS instrument. The IR spectra were recorded on a Shimadzu IR-440 spectrometer. Column chromatography was carried out on silica gel H (10-40 mm). Differential scanning calorimetry (DSC) measurements were performed with a Perkin Elmer Pyris 1 at a scanning rate for both heating and cooling of 10 °C min<sup>-1</sup>. Thermogravimetric analysis (TGA) measurements were carried out with a TA Q500 by heating samples at 20 °C min<sup>-1</sup> from room temperature to 700 °C in a dynamic nitrogen atmosphere. In Hyper-Rayleigh Scattering experiment, we used Nd:YAG laser working at 1064 nm with 8 ns pulses duration and 10 Hz repetition rate.

**Quaternization of N-arylimidazoles:** *N*-arylimidazole (1 mmol), 1-chloro-2,4-dinitrobenzene (1.2 mmol) were mixed together in a dry 5 ml sealed tube. To this mixture were added dry CH<sub>3</sub>CN (0.5 ml). The mixture was heated at 120 °C. After 18 h, the mixture of acetone and dimethyl ether (1:1, 2 ml) was added. The precipitate was filtered and crude product purification was performed by recrystallization with ethanol/dimethyl ether to afford the desired chlorates.

**1-(2,4-dinitrophenyl)-3-phenyl-imidazolium chloride (2a):** Yield 58%.  $^1\text{H}$  NMR ( $\text{D}_2\text{O}$ ,  $\delta$ ): 9.29 (s, 1 H), 8.85 (d,  $J = 9.0$  Hz, 1 H), 8.20 (s, 1 H), 8.18 (d,  $J = 9.0$  Hz, 1 H), 8.04 (s, 1 H), 7.65-7.78 (m, 5 H); IR (KBr):  $\nu = 3029, 2878, 2785, 1859, 1607, 1549, 1494, 1457, 1350, 1260, 1147, 1085, 899, 837, 778, 760, 738, 688, 653, 521\text{ cm}^{-1}$ ; MS (ESI,  $m/z$ ): 311.2  $[\text{M}-\text{Cl}]^+$ ; Anal. calcd for  $\text{C}_{15}\text{H}_{11}\text{ClN}_4\text{O}_4$ : C 51.96, H 3.20, N 16.16; Found: C 52.00, H 3.24, N 16.38.

**1-(2,4-dinitrophenyl)-3-p-tolyl-imidazolium chloride (2b):** Yield 87%.  $^1\text{H}$  NMR ( $\text{D}_2\text{O}$ ,  $\delta$ ): 9.29 (s, 1 H), 8.86 (d,  $J = 8.4$  Hz, 1 H), 8.19 (d,  $J = 8.4$  Hz, 1 H), 8.17 (s, 1 H), 8.04 (s, 1 H), 7.62 (d,  $J = 8.4$  Hz, 2 H), 7.50 (d,  $J = 8.4$  Hz, 2 H), 2.36 (s, 3 H); IR (KBr):  $\nu = 3495, 3247, 3167, 3058, 2778, 1983, 1774, 1621, 1508, 1357, 1242, 1067, 956, 911, 815, 739, 651, 624, 523\text{ cm}^{-1}$ ; MS (ESI,  $m/z$ ): 325.2  $[\text{M}-\text{Cl}]^+$ ; Anal. calcd for  $\text{C}_{16}\text{H}_{13}\text{ClN}_4\text{O}_4$ : C 53.27, H 3.63, N 15.53; Found: C 53.16, H 3.68, N 15.31.

**1-(2,4-dinitrophenyl)-3-(4-hydroxyphenyl)-imidazolium chloride (2c):** 4-(imidazol-1-yl)phenol (4 mmol), 1-chloro-2,4-dinitrobenzene (4.8 mmol) were mixed together in a dry 5 ml sealed tube. To this mixture were added dry  $\text{CH}_3\text{CN}$  (2 ml). The mixture was heated at  $120^\circ\text{C}$ . After 48 h, acetonitrile was removed under reduced pressure. The residue was washed with ethanol ( $3 \times 5$  mL) and dried in vacuo. Yield 62%.  $^1\text{H}$  NMR ( $\text{DMSO}-d_6$ ,  $\delta$ ): 10.31 (s, 1 H), 9.08 (d,  $J = 2.4$  Hz, 1 H), 8.93 (dd,  $J = 8.8$  Hz,  $J = 2.4$  Hz, 1 H), 8.51 (s, 1 H), 8.39 (s, 1 H), 8.38 (d,  $J = 8.8$  Hz, 1 H), 7.70 (d,  $J = 8.9$  Hz, 2 H), 7.07 (d,  $J = 8.9$  Hz, 2 H); IR (KBr):  $\nu = 3434, 3154, 3127, 2567, 2444, 1969, 1898, 1764, 1621, 1450, 1358, 1280, 1225, 1150, 1069, 952, 906, 865, 845, 746, 684, 642, 627, 549, 524\text{ cm}^{-1}$ ; Anal. calcd for  $\text{C}_{15}\text{H}_{11}\text{ClN}_4\text{O}_5$ : C 49.67, H 3.06, N 15.45; Found: C 49.91, H 3.13, N 15.77.

**1-(2,4-dinitrophenyl)-3-(4-methoxyphenyl)-imidazolium chloride (2d):** 1-(4-methoxyphenyl)-imidazole (20 mmol), 1-chloro-2,4-dinitrobenzene (22 mmol) were mixed together in a 50 ml tube equipped with a condensor. To this mixture were added dry acetone (15 ml). The mixture was heated at  $80^\circ\text{C}$ . After 8 h, the precipitate was filtered and washed with acetone ( $3 \times 5$  mL). The crude product purification was performed by recrystallization with ethanol/dimethyl ether to afford the mild yellow powder 6.319 g. Yield 84%.  $^1\text{H}$  NMR ( $\text{DMSO}-d_6$ ,  $\delta$ ): 10.41 (s, 1 H), 9.09 (d, 1 H,  $J = 2.4$  Hz), 8.95 (dd,  $J = 8.7$  Hz,  $J = 2.4$  Hz, 1 H), 8.58 (t,  $J = 1.8$  Hz, 1 H), 8.43 (t,  $J = 1.8$  Hz, 1 H), 8.41 (d,  $J = 8.7$  Hz, 2 H), 7.86 (d,  $J = 9.1$  Hz, 2 H), 7.26 (d, 2 H,  $J = 9.1$  Hz), 3.87 (s, 3 H); IR (KBr):  $\nu = 3402, 3140, 3021, 2886, 2771, 1849, 1665, 1618, 1508, 1358, 1250, 1078, 1017, 953, 897, 860, 773, 662, 530\text{ cm}^{-1}$ ; MS (ESI,  $m/z$ ): 341.2  $[\text{M}-\text{Cl}]^+$ ; Anal. calcd for  $\text{C}_{16}\text{H}_{13}\text{ClN}_4\text{O}_5$ : C 51.01, H 3.48, N 14.87; Found: C 50.78, H 3.68, N 14.59.

**Metathetical reaction of 2 with  $\text{KPF}_6$  or  $\text{LiNTf}_2$ :** Salts **2** (1 mmol) was dissolved in a mixture of water and acetone (1:1, 10 mL) and treated with an aqueous solution of  $\text{LiNTf}_2$  (1.1 mmol, 5 ml) or  $\text{KPF}_6$  (1.1 mmol). After 4 h, acetone was removed at reduced pressure. The precipitate was filtered and washed with water ( $3 \times 5$  mL). The water layer was extracted with  $\text{CH}_2\text{Cl}_2$  ( $3 \times 15$  mL). The precipitate was dissolved in the combined organic layer, washed with water ( $3 \times 15$  mL) and evaporated in vacuo to give **3** and **4**.

**1-(2,4-dinitrophenyl)-3-phenyl-imidazolium hexafluorophosphate (3a):** Yield 95%. <sup>1</sup>H NMR (Acetone-d<sub>6</sub>, δ): 10.00 (s, 1 H), 9.07 (d, *J* = 2.5 Hz, 1 H), 8.83 (dd, *J* = 8.7 Hz, *J* = 2.5 Hz, 1 H), 8.41 (t, *J* = 1.8 Hz, 1 H), 8.36 (d, *J* = 8.7 Hz, 1 H), 8.29 (t, *J* = 1.8 Hz, 1 H), 7.82 (d, *J* = 8.1 Hz, 2 H), 7.59-7.64 (m, 3 H); <sup>19</sup>F NMR (Acetone-d<sub>6</sub>, δ): -71.34 (d, *J* = 709.8 Hz, 6 F); IR (KBr): ν = 3148, 3105, 3078, 2877, 1618, 1530, 1409, 1353, 1255, 1117, 1073, 911, 838, 741, 691, 638, 559, 507 cm<sup>-1</sup>; MS (ESI, *m/z*): 311 [M-PF<sub>6</sub>]<sup>+</sup> Anal. calcd for C<sub>15</sub>H<sub>11</sub>F<sub>6</sub>N<sub>4</sub>O<sub>4</sub>P: C 39.49, H 2.43, N 12.28; Found: C 39.64, H 2.53, N 12.26.

**1-(2,4-dinitrophenyl)-3-p-tolyl-imidazolium hexafluorophosphate (3b):** Yield 92%. <sup>1</sup>H NMR (Acetone-d<sub>6</sub>, δ): 9.99 (s, 1 H), 9.07 (d, *J* = 2.5 Hz, 1 H), 8.83 (dd, *J* = 8.6 Hz, *J* = 2.5 Hz, 1 H), 8.38 (t, *J* = 1.8 Hz, 1 H), 8.37 (d, *J* = 8.6 Hz, 1 H), 8.29 (t, *J* = 1.8 Hz, 1 H), 7.69 (d, *J* = 8.6 Hz, 2 H), 7.43 (d, *J* = 8.6 Hz, 2 H), 2.34 (s, 3 H); <sup>19</sup>F NMR (Acetone-d<sub>6</sub>, δ): -72.57 (d, *J* = 707.3 Hz, 6 F); IR (KBr): ν = 3647, 3151, 3102, 2865, 1612, 1551, 1341, 1244, 1151, 1098, 1071, 882, 736, 642, 557 cm<sup>-1</sup>; MS (ESI, *m/z*): 325.2 [M-PF<sub>6</sub>]<sup>+</sup>; Anal. calcd for C<sub>16</sub>H<sub>13</sub>F<sub>6</sub>N<sub>4</sub>O<sub>4</sub>P: C 40.86, H 2.79, N 11.91; Found: C 41.09, H 2.89, N 12.07.

**1-(2,4-dinitrophenyl)-3-(4-hydroxyphenyl)-imidazolium hexafluorophosphate (3c):** Ionic salts **2c** ( 1 mmol ) was dissolved in a mixture of water, methanol and acetone ( 1:1:1, 15 mL ) and treated with an aqueous solution of KPF<sub>6</sub> ( 1.2 mmol, 5 ml ). After 12 h, acetone and methanol were removed at reduced pressure. The precipitate was filtered and washed with water (3×5 mL). The water layer was extracted with CH<sub>2</sub>Cl<sub>2</sub> (3×15 mL). The precipitate was dissolved in the combined organic layer, washed with water (3×15 mL) and evaporated in vacuo to give the product. Yield 87%. <sup>1</sup>H NMR (Acetone-d<sub>6</sub>, δ): 9.98 (s, 1 H), 9.19 (d, *J* = 2.5 Hz, 1 H), 8.95 (dd, *J* = 8.7 Hz, *J* = 2.5 Hz, 1 H), 8.48 (d, *J* = 8.7 Hz, 1 H), 8.41 (s, 1 H), 8.36 (s, 1 H), 7.75 (d, *J* = 8.9 Hz, 2 H), 7.13 (d, *J* = 8.9 Hz, 2 H); <sup>19</sup>F NMR (Acetone-d<sub>6</sub>, δ): -72.24 (d, *J* = 707.0 Hz, 6 F); IR (KBr): ν = 3526, 3149, 2881, 1939, 1839, 1809, 1624, 1508, 1454, 1413, 1365, 1252, 1201, 1174, 1116, 1201, 1174, 1116, 1073, 952, 828, 743, 624 cm<sup>-1</sup>; Anal. calcd for C<sub>15</sub>H<sub>11</sub>F<sub>6</sub>N<sub>4</sub>O<sub>5</sub>P: C 38.15, H 2.35, N 11.86; Found: C 38.38, H 2.41, N 12.09.

**1-(2,4-dinitrophenyl)-3-(4-methoxyphenyl)-imidazolium hexafluorophosphate (3d):** Yield 94%. <sup>1</sup>H NMR (Acetone-d<sub>6</sub>, δ): 9.92 (s, 1 H), 9.07 (d, *J* = 2.6 Hz, 1 H), 8.83 (dd, *J* = 8.7 Hz, *J* = 2.6 Hz, 1 H), 8.36 (d, *J* = 8.7 Hz, 1 H), 8.33 (d, *J* = 1.7 Hz, 1 H), 8.26 (d, *J* = 1.7 Hz, 1 H), 7.73 (d, *J* = 9.0 Hz, 2 H), 7.13 (d, *J* = 9.0 Hz, 2 H), 3.80 (s, 3 H); <sup>19</sup>F NMR (Acetone-d<sub>6</sub>, δ): -71.34 (d, *J* = 706.7 Hz, 6 F); IR (KBr): ν = 3173, 2942, 2879, 2851, 1885, 1620, 1582, 1460, 1345, 1256, 1185, 1073, 1017, 962, 866, 732, 694, 638, 559 cm<sup>-1</sup>; Anal. calcd for C<sub>16</sub>H<sub>13</sub>F<sub>6</sub>N<sub>4</sub>O<sub>5</sub>P: C 39.52, H 2.69, N 11.52; Found: C 39.50, H 2.58, N 11.51.

**1-(2,4-dinitrophenyl)-3-phenyl-imidazolium bis(trifluoromethylsulfonyl)amide (4a):** Yield 88%. <sup>1</sup>H NMR (Acetone-d<sub>6</sub>, δ): 10.06 (s, 1 H), 9.08 (d, *J* = 2.5 Hz, 1 H), 8.84 (dd, *J* = 8.7 Hz, *J* = 2.5 Hz, 1 H), 8.44 (t, *J* = 1.7 Hz, 1 H), 8.40 (d, *J* = 8.7 Hz, 1 H), 8.32 (t, *J* = 1.7 Hz, 1 H), 7.83 (d, *J* = 7.9 Hz, 2 H), 7.58-7.67 (m, 3 H); <sup>19</sup>F NMR (Acetone-d<sub>6</sub>, δ): -78.76 (s, 6 F); IR (KBr): ν = 3145, 3078, 2963, 2891, 1619, 1536, 1492, 1352, 1262,

1007, 909, 854, 797, 739, 690, 648, 598, 571, 521, 507  $\text{cm}^{-1}$ ; MS (ESI,  $m/z$ ): 311  $[\text{M-NTf}_2]^+$ ; Anal. calcd. for  $\text{C}_{17}\text{H}_{11}\text{F}_6\text{N}_5\text{O}_8\text{S}$ : C 34.52, H 1.87, N 11.84; Found: C 34.58, H 2.11, N 11.52.

**1-(2,4-dinitrophenyl)-3-p-tolyl-imidazolium bis(trifluoromethylsulfonyl)amide (4b):** Yield 90%.  $^1\text{H}$  NMR (Acetone- $\text{d}_6$ ,  $\delta$ ): 10.14 (t,  $J = 1.7$  Hz, 1 H), 9.20 (d,  $J = 2.4$  Hz, 1 H), 8.96 (dd,  $J = 8.8$  Hz,  $J = 2.4$  Hz, 1 H), 8.52 (t,  $J = 1.8$  Hz, 1 H), 8.51 (d,  $J = 8.8$  Hz, 1 H), 8.43 (t,  $J = 1.8$  Hz, 1 H), 7.82 (d,  $J = 8.5$  Hz, 2 H), 7.56 (d,  $J = 8.5$  Hz, 2 H), 2.47 (s, 3 H);  $^{19}\text{F}$  NMR (Acetone- $\text{d}_6$ ,  $\delta$ ):  $-79.90$  (s, 6 F); IR (KBr):  $\nu = 3130, 3080, 2877, 1906, 1729, 1621, 1547, 1514, 1356, 1265, 1205, 1125, 1049, 951, 912, 868, 819, 790, 740, 687, 650, 570, 509$   $\text{cm}^{-1}$ ; Anal. calcd for  $\text{C}_{18}\text{H}_{13}\text{F}_6\text{N}_5\text{O}_8\text{S}_2$ : C 35.71, H 2.16, N 11.57; Found: C 35.86, H 2.11, N 11.56.

**1-(2,4-dinitrophenyl)-3-(4-methoxyphenyl)-imidazolium bis(trifluoromethylsulfonyl)amide (4d):** Yield 91%.  $^1\text{H}$  NMR (Acetone- $\text{d}_6$ ,  $\delta$ ): 9.94 (s, 1 H), 9.07 (d,  $J = 2.5$  Hz, 1 H), 8.82 (dd,  $J = 8.7$  Hz,  $J = 2.5$  Hz, 1 H), 8.37 (d,  $J = 8.7$  Hz, 1 H), 8.34 (s, 1 H), 8.27 (s, 1 H), 7.73 (d,  $J = 9.0$  Hz, 2 H), 7.13 (d,  $J = 9.0$  Hz, 2 H), 3.79 (s, 3 H);  $^{19}\text{F}$  NMR (Acetone- $\text{d}_6$ ,  $\delta$ ):  $-78.76$  (s, 6 F); IR (KBr):  $\nu = 3146, 3022, 2963, 2884, 2983, 2563, 2066, 1935, 1624, 1503, 1366, 1019, 901, 734, 659, 515$   $\text{cm}^{-1}$ ; Anal. calcd for  $\text{C}_{18}\text{H}_{13}\text{F}_6\text{N}_5\text{O}_9\text{S}_2$ : C 34.79, H 2.11, N 11.27; Found: C 34.74, H 2.31, N 11.14.

### X-ray Crystallography

X-ray diffraction data were collected using Bruker APEX CCD diffractometers.

**Table 1.** Hydrogen bonds for **3d** [Å and °]

| D-H...A                          | d(D-H) | d(H...A) | d(D...A) | ∠ (DHA) |
|----------------------------------|--------|----------|----------|---------|
| C(3)-H(3)...F(3) <sup>#1</sup>   | 0.93   | 2.59     | 3.341(5) | 138.2   |
| C(5)-H(5)...F(2) <sup>#2</sup>   | 0.93   | 2.55     | 3.127(5) | 120.2   |
| C(12)-H(12)...F(4) <sup>#3</sup> | 0.93   | 2.47     | 3.331(5) | 154.1   |
| C(15)-H(15)...F(2)               | 0.93   | 2.83     | 3.491(5) | 129.3   |
| C(1)-H(1)...F(5)                 | 0.93   | 2.53     | 3.278(5) | 138.1   |
| C(1)-H(1)...F(3)                 | 0.93   | 2.66     | 3.307(5) | 127.3   |
| C(1)-H(1)...F(2)                 | 0.93   | 2.51     | 3.429(5) | 169.4   |

**#1** x, -y+1/2, z-1/2      **#2** -x+1, -y, -z      **#3** x+1, y, z

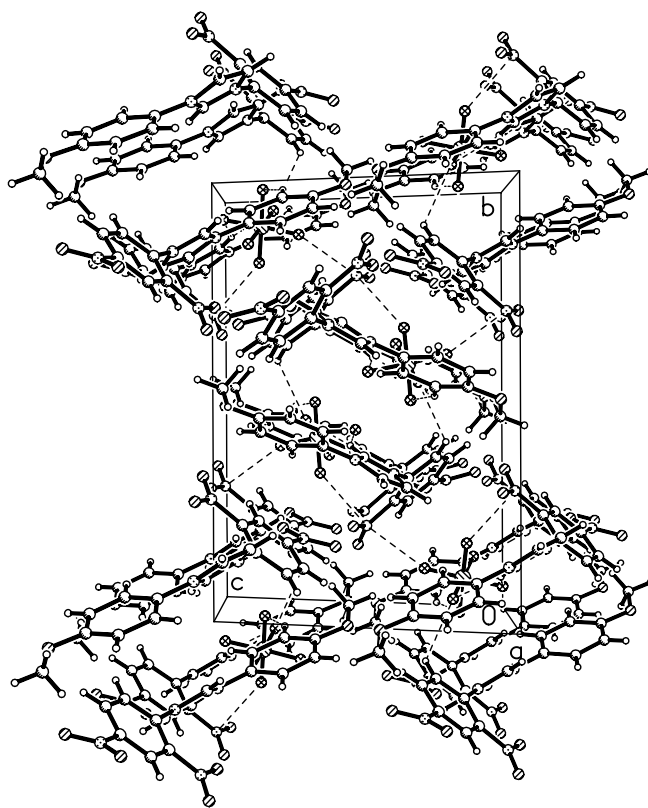

**Fig. 1** Packing diagram of **3d**
